# Supplementary material for: Mesoporous Silica Modified with Polydopamine and Zinc Ions as a Potential Carrier in the Controlled Release of Mercaptopurine
Source: MDPI journal article supplement (doi:10.3390/ma16124358), 2023-06-13
Supplement: s1 [file s1]

# Mesoporous Silica Modified with Polydopamine and Zinc Ions as a Potential Carrier in the Controlled Release of Mercaptopurine

Mariusz Sandomierski <sup>1,\*</sup>, Martyna Chojnacka <sup>1</sup>, Maria Długosz <sup>1</sup>, Monika Pokora <sup>2</sup>, Joanna Zwolińska <sup>2</sup>, Łukasz Majchrzycki <sup>2</sup> and Adam Voelkel <sup>1</sup>

<sup>1</sup> Institute of Chemical Technology and Engineering, Poznan University of Technology, ul. Berdychowo 4, 60-965 Poznań, Poland

<sup>2</sup> Center for Advanced Technologies, Adam Mickiewicz University, Poznań, ul. Uniwersytetu Poznańskiego 10, 61-614 Poznań, Poland

\* Correspondence: mariusz.sandomierski@put.poznan.pl

**Table S1.** Composition of the SBF used in this work (1000 ml of the SBF).

| Order | Reagent                                            | Amount   |
|-------|----------------------------------------------------|----------|
| 1     | NaCl                                               | 8.035 g  |
| 2     | NaHCO <sub>3</sub>                                 | 0.355 g  |
| 3     | KCl                                                | 0.225 g  |
| 4     | K <sub>2</sub> HPO <sub>4</sub> ·3H <sub>2</sub> O | 0.231 g  |
| 5     | Na <sub>2</sub> SO <sub>4</sub>                    | 0.072 g  |
| 6     | TRIS                                               | 0.6112 g |
| 7     | HCl                                                | 0-5 ml   |
